# Supplementary figures and images for: Bromodomain-Containing Protein 9 Regulates Signaling Pathways and Reprograms the Epigenome in Immortalized Human Uterine Fibroid Cells
Source: MDPI journal article supplement (doi:10.3390/ijms25020905), 2024-01-11

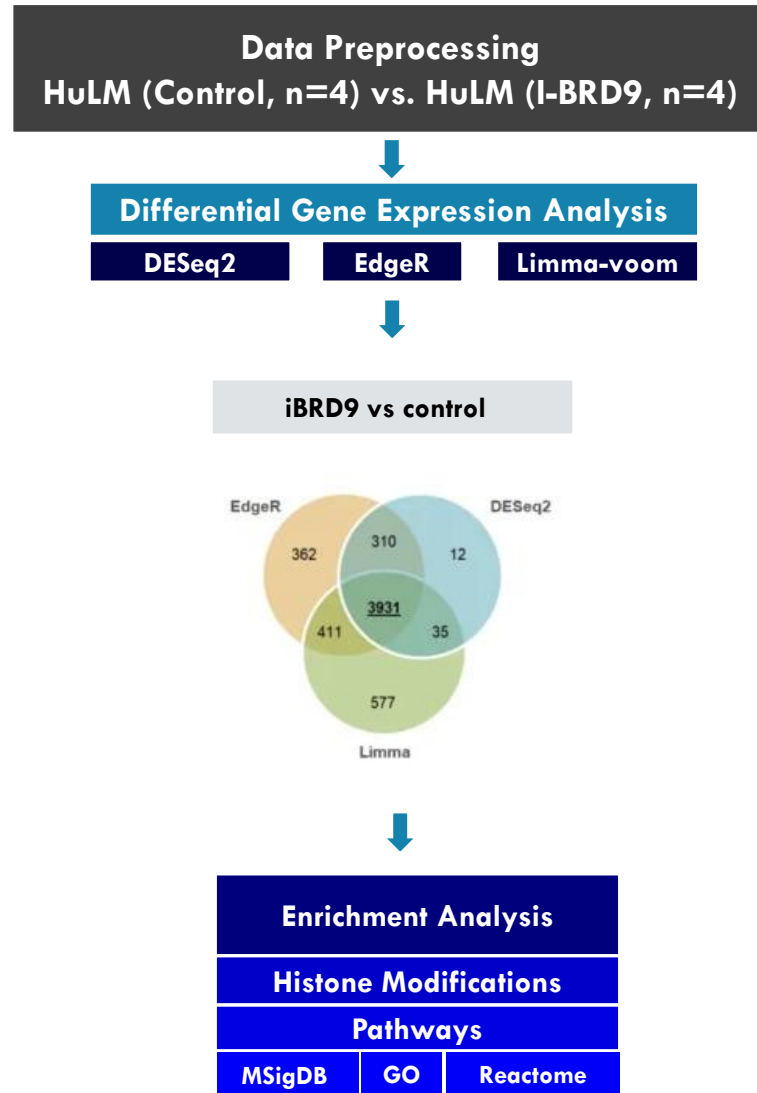

Fig. S1

**A**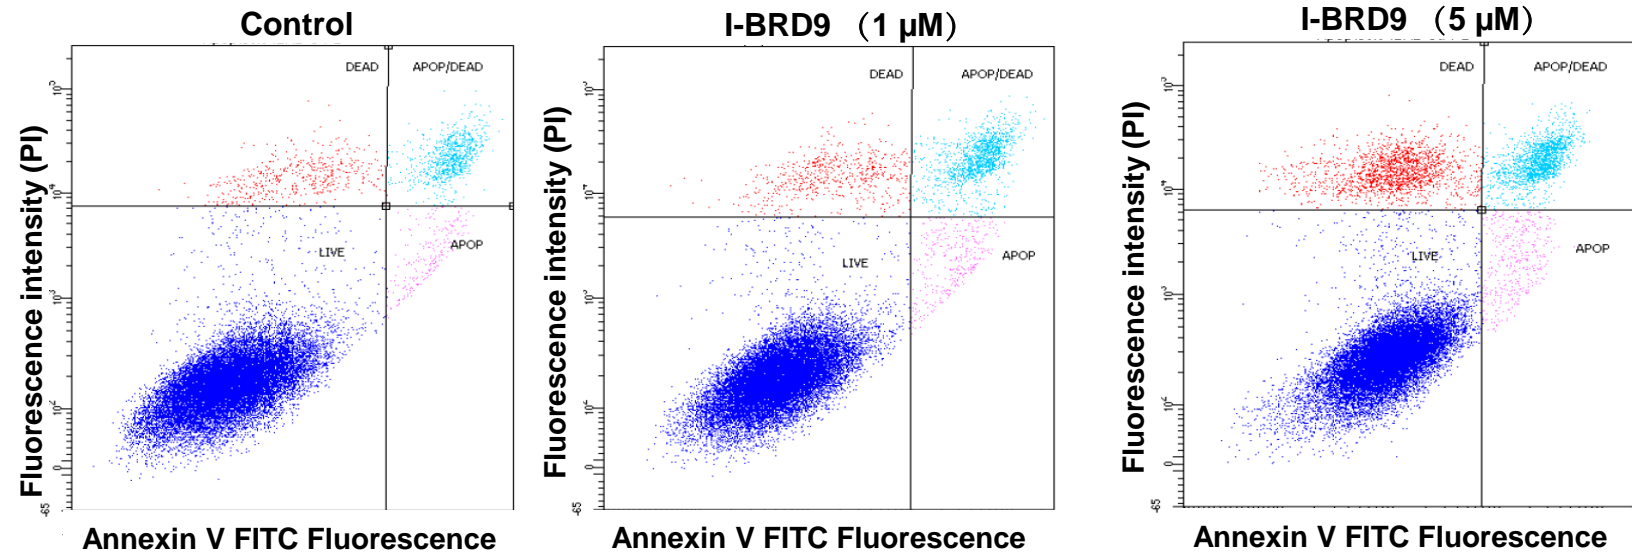**B**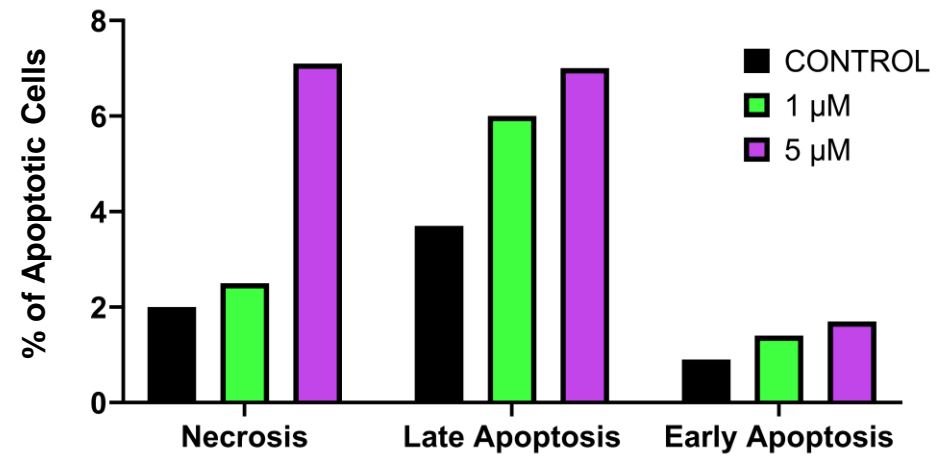

Fig. S2

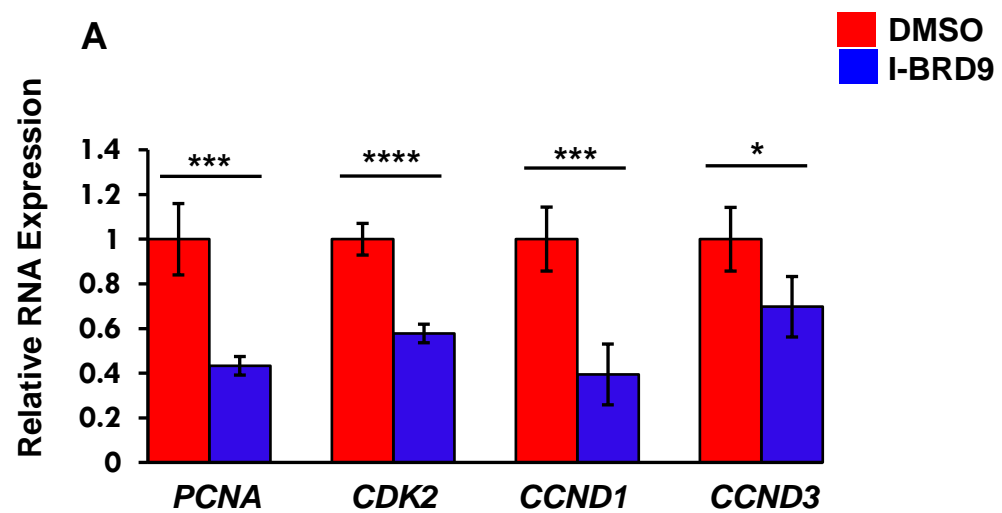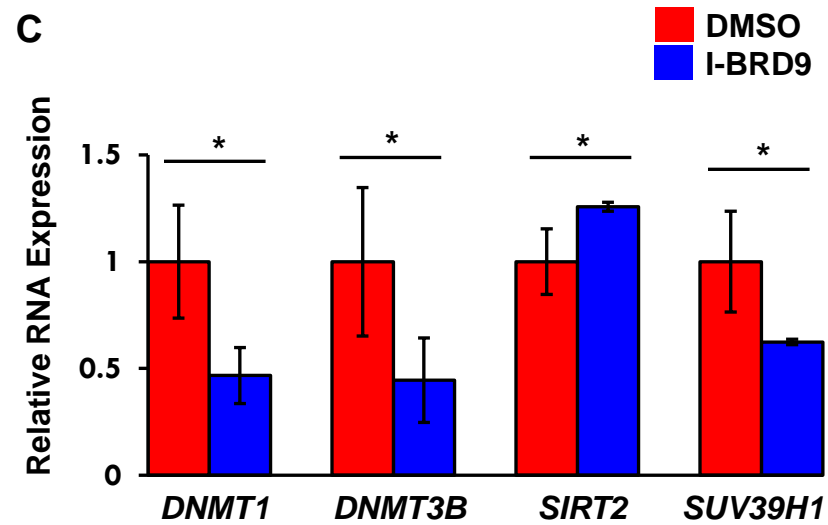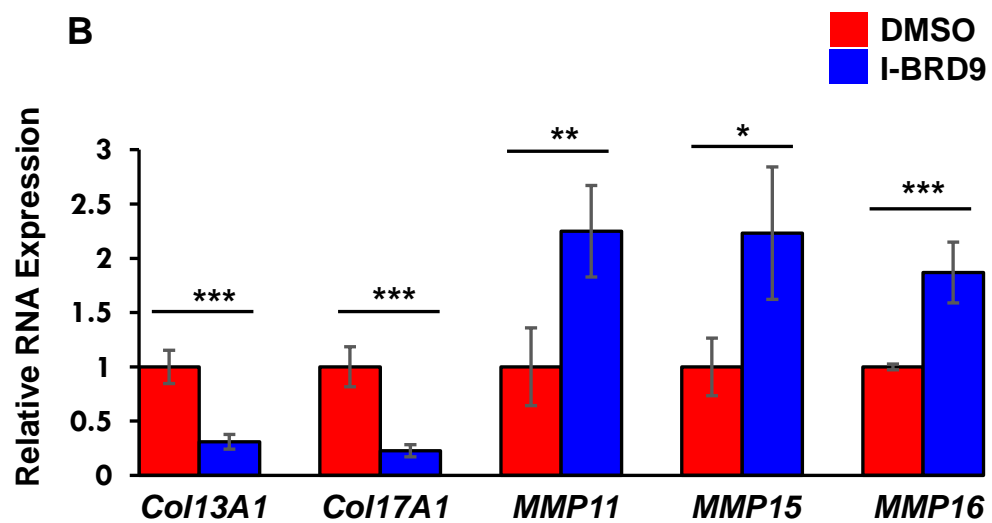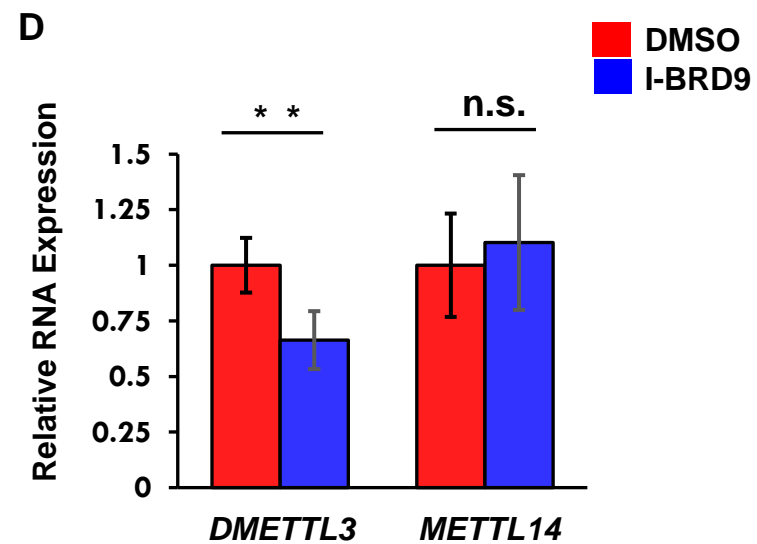

Fig.S3

Supplement: s1 [file s1]
